# Supplementary material
Source: PubMed Central journal article supplement (PMC2633537)
Supplement: 0807961106_0807961106SI.pdf [file 0807961106_0807961106SI.pdf]

# Supporting Information

Hajdusek et al. 10.1073/pnas.0807961106

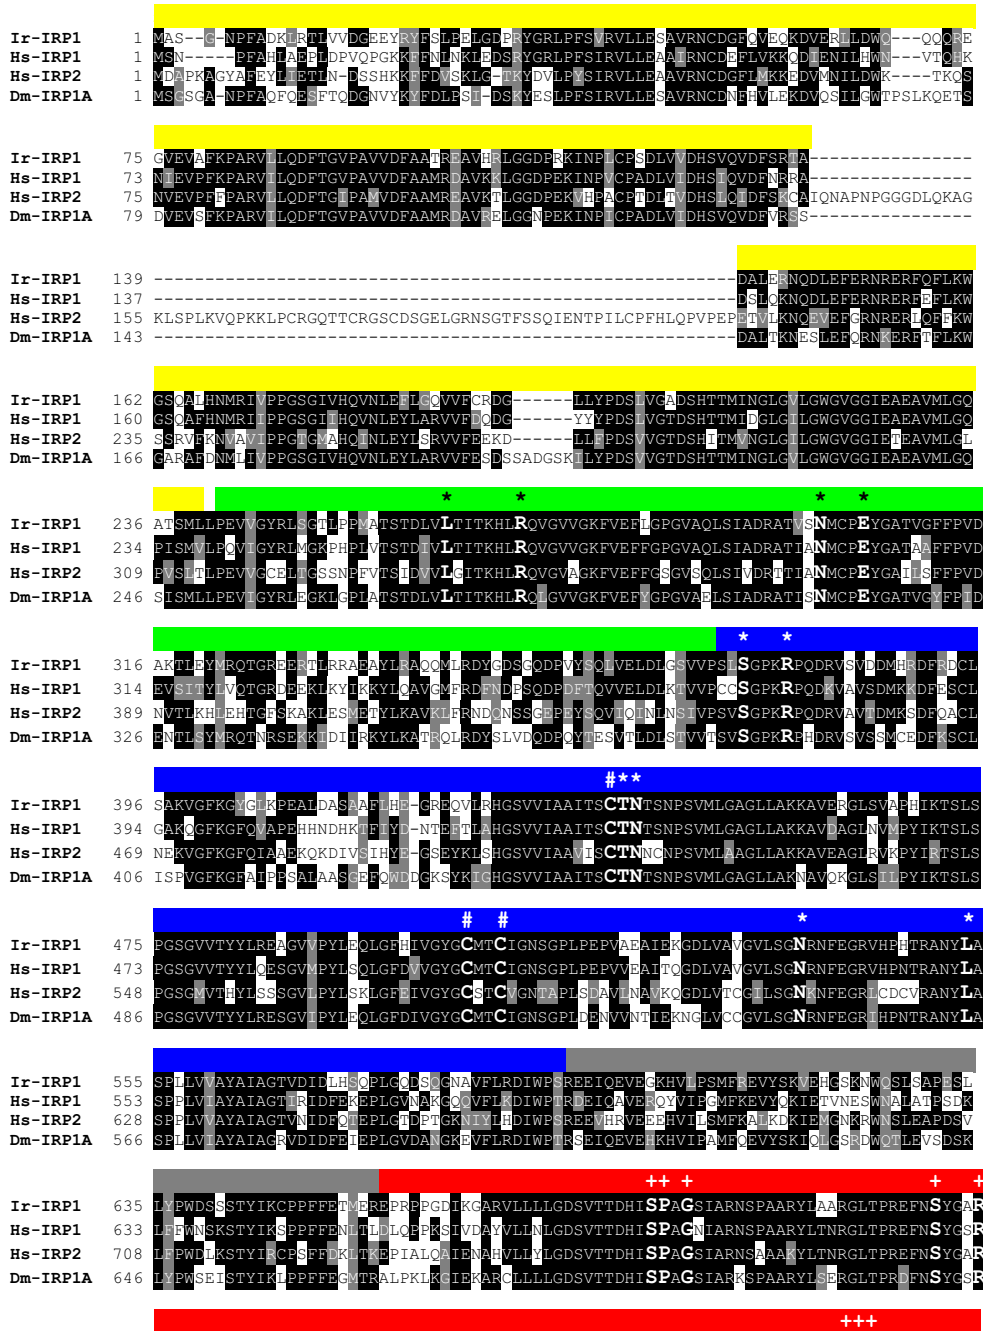

**Fig. S1.** Multiple alignment of *Ixodes ricinus* IRP1 with human IRP1, IRP2 and *Drosophila* IRP1. The domains are colored according to the human c-aconitase/IRP1 crystal structure (Dupuy et al. (2006) Structure 14:129–139). #, residues binding Fe-S cluster in active c-aconitase. \*, IRP1 residues interacting with A15, G16, and U17 of the iron responsive element head. +, residues interacting with conserved C8 of iron responsive stem (according to Walden et al. (2006) Science 314:1903–1908). Ir-IRP1 (*Ixodes ricinus* EU885952), Hs-IRP1 (*Homo sapiens* NP.002188), Hs-IRP2 (*H. sapiens* AA117484), Dm-IRP1A (*Drosophila melanogaster* CAB93519).

1 atttttcagacgcacgaaagacagatcagcaccgctcgatccacatccatcatgaagcaatttggtcatccttgcgctcatoggcgc 90  
1 *M K Q F V V I L A L I G A* 13

91 agcgacgtcagggacaattttgttcgaaaacctggacaagtaccgcttcaagatgaatgtcaagcagcgctgcaggaacacatcaatgt 180  
14 *A T S* G N N L F E N L D K Y P L Q D E *C* Q A A L Q E H I N V 43

181 cgaaatgcacgcaagcctcgatatatgacagatggcggcacacttcgacaacaacaagtggctcggaagggtttcagtactttctttgc 270  
44 *E M H A S L V Y* M Q M A A H F D N N K V A R K G F S T F F A 73  
\* \*

271 cgagaactccaagaggaacgtgagcagcggccaaaagatcatcgactacatcaacaagaggggagcaccgctctcgctcgtcaatatcga 360  
74 E N S K *E E* R E *H* A Q K I I D Y I N K R G S T V S L V N I D 103  
\* \* \*

361 catgccctgatcaccacttgaaatccggttttgcaagcgtgagatgccatcagcttgagagaacaagtacccaacaagctccacgc 450  
104 M P L I T T W K S V L Q A L R D A I S L *E* N K V T N K L H A 133  
\*

451 cgtgcacaagattgccgatgaggagtgcaaagaccctcagctcatggacttcacgagagcgagttcttgaggagcaagtgaattccat 540  
134 V H K I A D E E *C* K D P Q L M D F I E S E F L E E *Q* V N S I 163  
\*

541 tgacaagctgcagcgaatgattacagtactcagtaacatggactccggcacggggagtagctgttgacagagagctgctcggagacaa 630  
164 D K L Q R M I T V L S N M D S G T G E Y L L D R E L L G D K 193

631 gaaggaattt*Eaa*gcacttgcttttcagtagaatcccaattccaagcgtgctcgctgggtcggcgacaaatcaaggtgtattgaaggac 720  
194 K E F *stop* 197

721 tcaaaactgcaagaaacactttctggttgccctagaaaacattcatatgtattggttaaacgcttcaaaactttccctatcccaactatcct 810  
811 atttgttttcaaaacttcccactgatttttagttttgacgaattctggggagcaggggcatctgttgcaataaaaggtcaaacgacagcaa 900  
901 aaaaaaaaaaaaaaaaaaaaaaaaaaaaaa 928

**Fig. S2.** Secreted ferritin (fer2) cDNA and deduced amino acid sequence. The signal peptide is in italics, highlighted by green. Cysteine residues are marked in yellow. Asterisks and red color depict the conserved residues of ferroxidase centers of heavy chain ferritins [Hempstead *et al.* (1997) *J Mol Biol* 268:424–448].

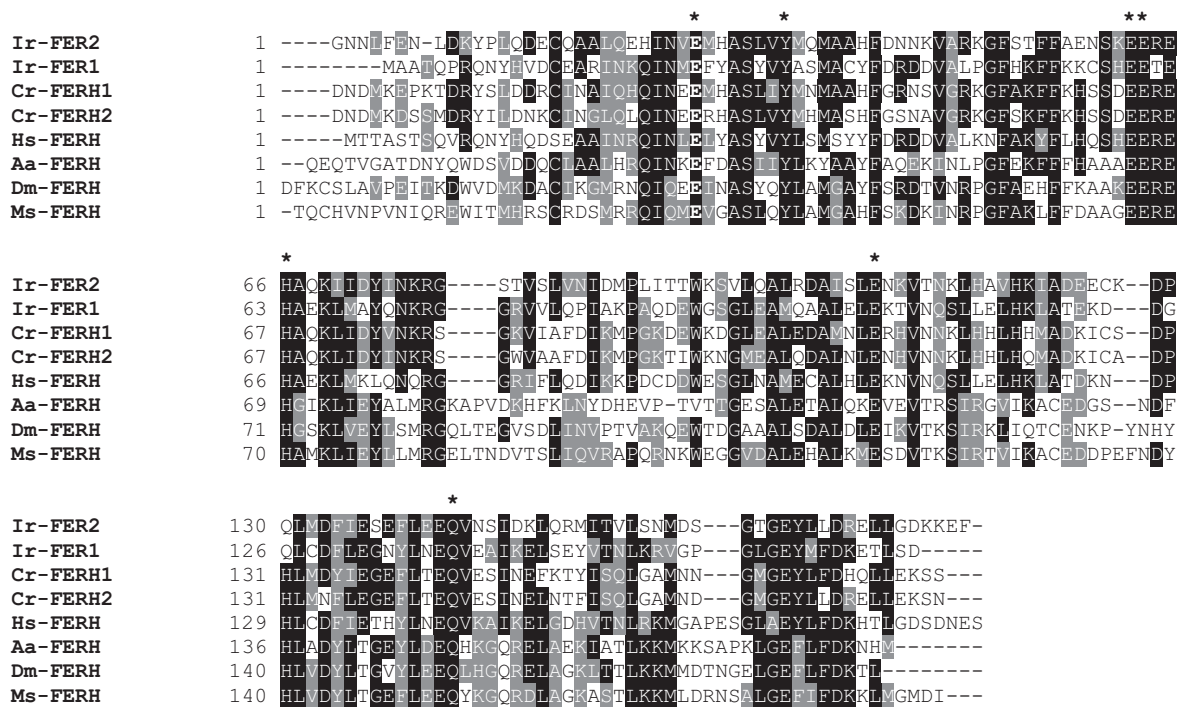

**Fig. S3.** Multiple alignment of *I. ricinus* secreted ferritin2 (FER2) with intracellular ferritin1 (FER1), human ferritin and selected invertebrate ferritins. The mature proteins without signal peptides are aligned. Asterisks depict conserved residues of ferroxidase centers of heavy chain ferritins (Hempstead *et al.* (1997) *J Mol Biol* 268:424–448). Ir-FER2 (*Ixodes ricinus* EU885951, heavy chain), Ir-FER1 (*Ixodes ricinus* AAC19131, heavy chain), Cr-FERH1 (*Carcinoscorpis rotundicauda* AY691510, heavy chain), Cr-FERH2 (*Carcinoscorpis rotundicauda* AY691511, heavy chain), Hs-FERH (*Homo sapiens* AF088851, heavy chain), Aa-FERH (*Aedes aegypti* AF126431, heavy chain), Dm-FERH (*Drosophila melanogaster* NP.733358, heavy chain), Ms-FERH (*Manduca sexta* AAK39636, heavy chain).

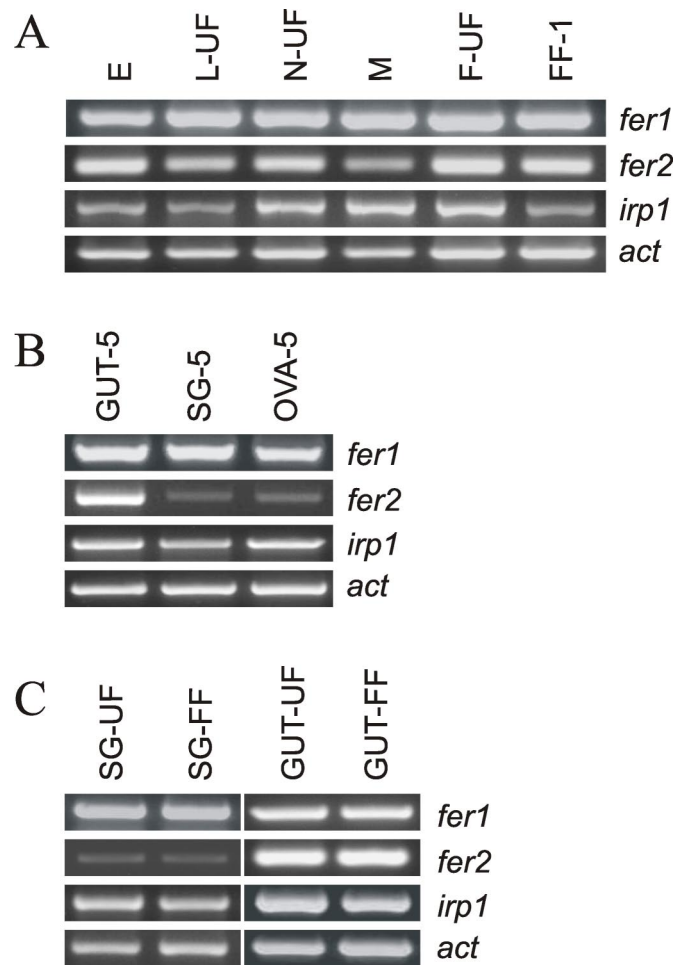

**Fig. S4.** Transcription profiles and dynamics of *fer1*, *fer2* and *irp1*. RT-PCR was performed on different cDNAs. Transcription levels of tick developmental stages (A), tissues of half engorged (fed for 5 days) ticks (B), and tissues of unfed and fully fed ticks (C). E, eggs; L, larvae; N, nymphs; M, males; F, females; GUT, gut tissue; SG, salivary glands; OVA, ovaries; UF unfed; FF, fully fed; FF-1, female fed for 1 day. Numbers indicate the days of feeding.

Table S1. Putative iron metabolism genes found in NCBI *I. scapularis* EST database using BLASTN search

| Gene                       | Function                                            | BLASTN search against<br>EST <i>I. scapularis</i> (GB#) | BLASTX search homology                                         | <i>E</i>             |
|----------------------------|-----------------------------------------------------|---------------------------------------------------------|----------------------------------------------------------------|----------------------|
| Ferritin                   | Iron storage                                        | EW833235                                                | Ferritin <i>Ixodes scapularis</i>                              | $3 \times 10^{-96}$  |
|                            |                                                     | EW871480                                                | Ferritin heavy chain-1b<br><i>Carcinoscorpius rotundicauda</i> | $2 \times 10^{-48}$  |
| Iron regulatory protein    | Translation control factor/cytoplasmic<br>aconitase | EW889997                                                | Aconitase 1 <i>Mus musculus</i>                                | $1 \times 10^{-119}$ |
| Transferrin                | Iron transport, immune function                     | EW961538                                                | Transferrin 2 <i>Drosophila<br/>melanogaster</i>               | $6 \times 10^{-63}$  |
| Divalent metal transporter | Metal (Mn, Zn, Cd, Fe, ...) transport               | EW887153                                                | Divalent metal transporter<br><i>Homo sapiens</i>              | $7 \times 10^{-85}$  |

**Table S2. Primers used**

| Gene                      | GenBank Accession no. | Primer name                                  | Sequence, 5' to 3'                                                                              |
|---------------------------|-----------------------|----------------------------------------------|-------------------------------------------------------------------------------------------------|
| Ferritin1                 | AF068224              | FER1-F<br>FER1-R                             | CCAAACGGTTCGCTTTCCTC<br>GAGCCCCACTCGTCCTGGG                                                     |
| Ferritin2                 | EU885951              | FER2-F<br>FER2-R<br>FER2-Exp-F<br>FER2-Exp-R | TATATGCAGATGGCGGCAC<br>GAGCTTGTTGGTCACTTTG<br>CACCGGAACAATTTGTTGAAAAC<br>GCAAGTGCTTAAAACCTCTCTG |
| Iron regulatory protein 1 | EU885952              | IRP1-F1<br>IRP1-R1                           | CAGCAAGAACTGGCAGAG<br>CAGGTGCAGGGTGCGTGG                                                        |
| Actin                     | AJ889837              | ACT-F<br>ACT-R                               | CCGTGCCGTGTTCCCTCCAT<br>CCGGCCGGCCAAGTCCAGA                                                     |

## Other Supporting Information Files

[Alignment and Sequence Descriptors for Fig. 3 \(ZIP\)](#)
